# Supplementary material
Source: PubMed Central journal article supplement (PMC7431430)
Supplement: mmc1.pdf [file mmc1.pdf]

# Could masks curtail the post-lockdown resurgence of COVID-19 in the US?

Calistus N. Ngonghala<sup>†,††,\*</sup>, Enahoro Iboi<sup>◇</sup>, and Abba B. Gumel<sup>‡,‡‡</sup>

<sup>†</sup> *Department of Mathematics, University of Florida, Gainesville, FL 32611, USA.*

<sup>††</sup> *Emerging Pathogens Institute, University of Florida, Gainesville, FL 32610, USA.*

<sup>◇</sup> *Department of Mathematics, Spelman College, Atlanta, Georgia, 30314, USA.*

<sup>‡</sup> *School of Mathematical and Statistical Sciences, Arizona State University, Tempe, Arizona, 85287, USA.*

<sup>‡‡</sup> *Department of Mathematics and Applied Mathematics, University of Pretoria, Pretoria 0002, South Africa.*

## Appendices

### A Tables of variable descriptions, parameter descriptions, and parameter values

Table A1: Description of the state variables of the model (2.1)

| State variable | Description                                                                              |
|----------------|------------------------------------------------------------------------------------------|
| $S$            | Population of susceptible individuals                                                    |
| $E$            | Population of exposed (newly-infected but not infectious) individuals                    |
| $E_p$          | Population of pre-symptomatic (infectious) individuals                                   |
| $I_a$          | Population of asymptotically-Infectious individuals                                      |
| $I_m$          | Population of infectious individuals with mild or moderate clinical symptoms of COVID-19 |
| $I_s$          | Population of infectious individuals with severe clinical symptoms of COVID-19           |
| $I_i$          | Population of infectious individuals in self-isolation                                   |
| $I_h$          | Population of hospitalized individuals                                                   |
| $I_c$          | Population of individuals in ICU                                                         |
| $R_u$          | Population of untested recovered individuals                                             |
| $R_t$          | Population of recovered individuals who received serology (antibody) test                |

\*Corresponding author: Email: [calistusnn@ufl.edu](mailto:calistusnn@ufl.edu)

Table A2: Description of parameters of the model (2.1)

| Parameter                                          | Description                                                                                                                                                                                                                                  |
|----------------------------------------------------|----------------------------------------------------------------------------------------------------------------------------------------------------------------------------------------------------------------------------------------------|
| $\beta_p(\beta_a)(\beta_m)(\beta_s)$               | Effective contact rate for individuals in the $E_p(I_a)(I_m)(I_s)$ class                                                                                                                                                                     |
| $\varepsilon_m$                                    | Efficacy of face masks to prevent transmission and acquisition of infection ( $0 < \varepsilon_m \leq 1$ )                                                                                                                                   |
| $c_m$                                              | Compliance in face mask usage in the community ( $0 < c_m \leq 1$ )                                                                                                                                                                          |
| $\theta$                                           | Efficacy of isolation (self-isolation), hospitalization and ICU admission to prevent infected individuals in isolation, from transmitting the disease ( $0 \leq \theta \leq 1$ )                                                             |
| $\tau_d$                                           | Detection rate of asymptotically-infected individuals <i>via</i> random diagnostic/surveillance testing                                                                                                                                      |
| $\tau_s$                                           | Detection rate of untested recovered individuals <i>via</i> serology (antibody) testing                                                                                                                                                      |
| $\tau_{dmax}(\tau_{smax})$                         | Maximum diagnostic (serology) detection rate                                                                                                                                                                                                 |
| $T_n$                                              | Average number of testing conducted <i>per</i> day                                                                                                                                                                                           |
| $\sigma_e$                                         | Progression rate from $E$ to $E_p$ class                                                                                                                                                                                                     |
| $\sigma_p$                                         | Progression rate of pre-symptomatic exposed individuals to $I_a, I_m$ or $I_s$ class                                                                                                                                                         |
| $r$                                                | Proportion of individuals in the $E_p$ class who show no clinical symptoms of COVID-19 at the end of the incubation period (and move to the $I_a$ class)                                                                                     |
| $1 - r$                                            | Proportion of individuals in the $E_p$ class who show clinical symptoms of COVID-19 at the end of the incubation period (and move to the $I_m$ class, at a rate $g(1 - r)\sigma$ , or to the $I_s$ class, at a rate $(1 - g)(1 - r)\sigma$ ) |
| $g$                                                | Proportion of individuals in the $E_p$ class who develop mild symptoms of COVID-19 at the end of the incubation period                                                                                                                       |
| $1 - g$                                            | Proportion of individuals in the $E_p$ class who develop severe symptoms of COVID-19 at the end of the incubation period                                                                                                                     |
| $f$                                                | Proportion of individuals in the $I_s$ class who are hospitalized                                                                                                                                                                            |
| $1 - f$                                            | Proportion of individuals in the $I_s$ class who are self-isolated                                                                                                                                                                           |
| $\rho_m$                                           | Self-isolation rate for individuals in the $I_m$ class                                                                                                                                                                                       |
| $(1 - f)\rho_s$                                    | Self-isolation rate for individuals in the $I_s$ class                                                                                                                                                                                       |
| $f\rho_s$                                          | Hospitalization rate for individuals in the $I_s$ class                                                                                                                                                                                      |
| $\xi_i$                                            | Hospitalization rate of self-isolated individuals                                                                                                                                                                                            |
| $\psi_h$                                           | ICU admission rate for hospitalized individuals                                                                                                                                                                                              |
| $\gamma_a(\gamma_s)(\gamma_h)(\gamma_i)(\gamma_c)$ | Recovery rate for individuals in the $I_a(I_s)(I_h)(I_i)(I_c)$ class                                                                                                                                                                         |
| $\delta_s(\delta_h)(\delta_i)(\delta_c)$           | Disease-induced death rate for individuals in the $I_s(I_h)(I_i)(I_c)$ class                                                                                                                                                                 |

Table A3: Baseline parameter values for the model (2.1) drawn from the literature.

| Parameter       | Value | Reference             |
|-----------------|-------|-----------------------|
| $\varepsilon_m$ | 0.5   | Estimated from [1]    |
| $\sigma_e$      | 1/2.5 | [2–6]                 |
| $\sigma_p$      | 1/2.5 | [4–7]                 |
| $r$             | 0.324 | Estimated from [8, 9] |
| $g$             | 0.719 | Estimated from [8, 9] |
| $\rho_s$        | 1/3.5 | [10]                  |
| $\psi_h$        | 1/6   | [11]                  |
| $\gamma_a$      | 1/5   | [11]                  |
| $\gamma_s$      | 1/10  | [6, 12]               |
| $\gamma_h$      | 1/8   | [12]                  |
| $\gamma_i$      | 1/7   | [13]                  |
| $\gamma_c$      | 1/10  | [6, 12]               |
| $\theta$        | 1     | Assumed               |

Table A4: Calibrated parameter values for the model (2.1) using cumulative mortality data for the state of Arizona. (a) Pre-lockdown period (i.e., from March 6 to March 31, 2020). (b) Lockdown period (i.e., from March 31 to May 15, 2020). The lower 95% confidence interval bound is denoted by CI (low), while the upper 95% confidence interval bound is denoted by CI (up).

(a) Estimated parameters for the pre-lockdown period.

(b) Estimated parameters for the lockdown period.

| Parameter       | Value  | 95% CI (low) | 95% CI (up) | Parameter       | Value  | 95% CI (low) | 95% CI (up) |
|-----------------|--------|--------------|-------------|-----------------|--------|--------------|-------------|
| $\beta_p$       | 1.4491 | 0.1988       | 1.8275      | $\beta_p$       | 1.3149 | 1.0225       | 1.4491      |
| $\beta_a$       | 0.5746 | 0.1000       | 0.9678      | $\beta_a$       | 0.5746 | 0.4512       | 0.5746      |
| $\beta_m$       | 0.6456 | 0.1000       | 3.1649      | $\beta_m$       | 0.4372 | 0.1000       | 0.6456      |
| $\beta_s$       | 0.4233 | 0.1000       | 0.6055      | $\beta_s$       | 0.3893 | 0.2265       | 0.4233      |
| $c_m$           | 0.0435 | 0.0357       | 0.0500      | $c_m$           | 0.1392 | 0.1100       | 0.1715      |
| $\tau_{dmax}$   | 0.2388 | 0.1537       | 0.4171      | $\tau_{dmax}$   | 0.4525 | 0.3257       | 0.5721      |
| $\rho_m$        | 0.2857 | 0.0571       | 0.2972      | $\rho_m$        | 0.2552 | 0.0982       | 0.2857      |
| $\xi_i$         | 0.2857 | 0.0857       | 0.2972      | $\xi_i$         | 0.2601 | 0.1287       | 0.2857      |
| $\delta_h$      | 0.0155 | 0.0050       | 0.0380      | $\delta_h$      | 0.0081 | 0.0073       | 0.0103      |
| $\delta_c$      | 0.0304 | 0.0300       | 0.0800      | $\delta_c$      | 0.0108 | 0.0097       | 0.0137      |
| $\delta_s$      | 0.0228 | 0.0225       | 0.0600      | $\delta_s$      | 0.0054 | 0.0073       | 0.0069      |
| $\delta_i$      | 0.0228 | 0.0225       | 0.0600      | $\delta_i$      | 0.0054 | 0.0049       | 0.0069      |
| $\mathcal{R}_c$ | 2.0510 | 0.7623       | 2.5078      | $\mathcal{R}_c$ | 0.9415 | 0.0049       | 0.9877      |

Table A5: Calibrated parameter values for the model (2.1) using cumulative mortality data for the state of Florida. (a) Pre-lockdown period (i.e., from March 1 to April 3, 2020). (b) Lockdown period (i.e., from April 3 to May 4, 2020). The lower 95% confidence interval bound is denoted by CI (low), while the upper 95% confidence interval bound is denoted by CI (up).

(a) Estimated parameters for the pre-lockdown period.

(b) Estimated parameters for the lockdown period.

| Parameter       | Value  | 95% CI (low) | 95% CI (up) | Parameter       | Value  | 95% CI (low) | 95% CI (up) |
|-----------------|--------|--------------|-------------|-----------------|--------|--------------|-------------|
| $\beta_p$       | 1.3523 | 0.8804       | 1.6706      | $\beta_p$       | 1.1505 | 0.6004       | 2.3827      |
| $\beta_a$       | 0.9232 | 0.4013       | 1.926       | $\beta_a$       | 0.9232 | 0.1160       | 0.9832      |
| $\beta_m$       | 0.6800 | 0.1000       | 0.8675      | $\beta_m$       | 0.5064 | 0.1154       | 0.6800      |
| $\beta_s$       | 0.2062 | 0.0100       | 0.2479      | $\beta_s$       | 0.1642 | 0.1021       | 0.2062      |
| $c_m$           | 0.0396 | 0.0374       | 0.05        | $c_m$           | 0.1647 | 0.0800       | 0.2056      |
| $\tau_{dmax}$   | 0.2309 | 0.1065       | 0.3011      | $\tau_{dmax}$   | 0.4681 | 0.3242       | 0.8105      |
| $\rho_m$        | 0.2857 | 0.0571       | 0.2956      | $\rho_m$        | 0.1612 | 0.0857       | 0.1714      |
| $\xi_i$         | 0.2561 | 0.0973       | 0.2857      | $\xi_i$         | 0.2568 | 0.1143       | 0.2571      |
| $\delta_h$      | 0.0051 | 0.0050       | 0.0320      | $\delta_h$      | 0.0067 | 0.0040       | 0.0150      |
| $\delta_c$      | 0.0308 | 0.0300       | 0.0702      | $\delta_c$      | 0.0075 | 0.0014       | 0.0135      |
| $\delta_s$      | 0.0231 | 0.0225       | 0.0527      | $\delta_s$      | 0.0056 | 0.0011       | 0.0101      |
| $\delta_i$      | 0.0231 | 0.0225       | 0.0527      | $\delta_i$      | 0.0056 | 0.0011       | 0.0101      |
| $\mathcal{R}_c$ | 2.0997 | 1.9118       | 2.2214      | $\mathcal{R}_c$ | 0.9772 | 0.6638       | 0.9859      |

Table A6: Calibrated parameter values for the model (2.1) using cumulative mortality data for the state of New York. (a) Pre-lockdown period (i.e., from March 1 to March 22, 2020). (b) Lockdown period ((i.e., from March 22 to May 28, 2020)). The lower 95% confidence interval bound is denoted by CI (low), while the upper 95% confidence interval bound is denoted by CI (up).

(a) Estimated parameters for the pre-lockdown period.

(b) Estimated parameters for the lockdown period.

| Parameter       | Value  | 95% CI (low) | 95% CI (up) | Parameter       | Value  | 95% CI (low) | 95% CI (up) |
|-----------------|--------|--------------|-------------|-----------------|--------|--------------|-------------|
| $\beta_p$       | 2.7450 | 1.3772       | 3.3895      | $\beta_p$       | 1.0363 | 0.4207       | 1.8901      |
| $\beta_a$       | 0.8989 | 0.1000       | 2.0134      | $\beta_a$       | 0.8989 | 0.2228       | 0.9889      |
| $\beta_m$       | 0.1254 | 0.1000       | 3.1228      | $\beta_m$       | 0.4046 | 0.1735       | 0.5978      |
| $\beta_s$       | 0.4246 | 0.1000       | 0.8043      | $\beta_s$       | 0.5943 | 0.1000       | 0.7425      |
| $c_m$           | 0.0190 | 0.0000       | 0.0500      | $c_m$           | 0.1500 | 0.1222       | 0.2162      |
| $\tau_{dmax}$   | 0.3010 | 0.3002       | 0.4940      | $\tau_{dmax}$   | 0.4485 | 0.3010       | 0.6142      |
| $\rho_m$        | 0.2857 | 0.0571       | 0.2896      | $\rho_m$        | 0.2466 | 0.1716       | 0.2857      |
| $\xi_i$         | 0.2822 | 0.0857       | 0.2857      | $\xi_i$         | 0.2426 | 0.1714       | 0.2571      |
| $\delta_h$      | 0.0371 | 0.0050       | 0.0400      | $\delta_h$      | 0.0097 | 0.0067       | 0.0221      |
| $\delta_c$      | 0.0434 | 0.0300       | 0.0800      | $\delta_c$      | 0.0129 | 0.0089       | 0.0221      |
| $\delta_s$      | 0.0326 | 0.0225       | 0.0600      | $\delta_s$      | 0.0065 | 0.0044       | 0.0111      |
| $\delta_i$      | 0.0326 | 0.0225       | 0.0600      | $\delta_i$      | 0.0065 | 0.0044       | 0.0111      |
| $\mathcal{R}_c$ | 2.5321 | 1.5460       | 3.2335      | $\mathcal{R}_c$ | 0.8480 | 0.5307       | 0.8955      |

Table A7: Calibrated parameter values for the model (2.1) using cumulative mortality data for the entire US. (a) Pre-lockdown period (i.e., from January 22 to April 7, 2020). (b) Lockdown period (i.e., from April 7 to May 28, 2020). The lower 95% confidence interval bound is denoted by CI (low), while the upper 95% confidence interval bound is denoted by CI (up).

(a) Estimated parameters for the pre-lockdown period.

(b) Estimated parameters for the lockdown period.

| Parameter       | Value  | 95% CI (low) | 95% CI (up) | Parameter       | Value  | 95% CI (low) | 95% CI (up) |
|-----------------|--------|--------------|-------------|-----------------|--------|--------------|-------------|
| $\beta_p$       | 0.7290 | 0.6677       | 0.7751      | $\beta_p$       | 0.4075 | 0.3327       | 0.5454      |
| $\beta_a$       | 0.8969 | 0.7745       | 0.9764      | $\beta_a$       | 0.6036 | 0.1008       | 0.8614      |
| $\beta_m$       | 0.8086 | 0.7530       | 0.9224      | $\beta_m$       | 0.4592 | 0.2531       | 0.7336      |
| $\beta_s$       | 0.4010 | 0.1870       | 0.4642      | $\beta_s$       | 0.1344 | 0.1053       | 0.2635      |
| $c_m$           | 0.0278 | 0.0276       | 0.0294      | $c_m$           | 0.1835 | 0.1312       | 0.2300      |
| $\tau_{dmax}$   | 0.1797 | 0.1722       | 0.1960      | $\tau_{dmax}$   | 0.2294 | 0.1799       | 0.3812      |
| $\rho_m$        | 0.1801 | 0.1584       | 0.1853      | $\rho_m$        | 0.2571 | 0.1045       | 0.2684      |
| $\xi_i$         | 0.1765 | 0.1316       | 0.2417      | $\xi_i$         | 0.0795 | 0.0571       | 0.1557      |
| $\delta_h$      | 0.0073 | 0.0052       | 0.0386      | $\delta_h$      | 0.0048 | 0.0043       | 0.0050      |
| $\delta_c$      | 0.0304 | 0.0300       | 0.0800      | $\delta_c$      | 0.0064 | 0.0058       | 0.0067      |
| $\delta_s$      | 0.0228 | 0.0225       | 0.0600      | $\delta_s$      | 0.0032 | 0.0029       | 0.0034      |
| $\delta_i$      | 0.0228 | 0.0225       | 0.0600      | $\delta_i$      | 0.0032 | 0.0029       | 0.0034      |
| $\mathcal{R}_c$ | 2.3277 | 2.2854       | 2.3758      | $\mathcal{R}_c$ | 0.8833 | 0.6363       | 0.8929      |

Table A8: Percentage of community transmission generated by asymptomatic  $(\beta_p + \beta_a)/(\beta_p + \beta_a + \beta_m + \beta_s)$  and symptomatic infectious individuals  $(\beta_m + \beta_s)/(\beta_p + \beta_a + \beta_m + \beta_s)$  during the pre-lockdown and lockdown periods in the states of Arizona, Florida, New York, and the entire US.

| Period       | Transmission source                              | Arizona | Florida | New York | US  |
|--------------|--------------------------------------------------|---------|---------|----------|-----|
| Pre-lockdown | Pre-symptomatic and asymptomatic ( $E_p + I_a$ ) | 65%     | 72%     | 87%      | 57% |
|              | Symptomatic ( $I_m + I_s$ )                      | 35%     | 28%     | 13%      | 43% |
| Lockdown     | Pre-symptomatic and asymptomatic ( $E_p + I_a$ ) | 70%     | 76%     | 66%      | 63% |
|              | Symptomatic ( $I_m + I_s$ )                      | 30%     | 24%     | 34%      | 37% |

Table A9: Percentage of community transmission generated by pre-symptomatic  $\beta_p/(\beta_p + \beta_a + \beta_m + \beta_s)$  and asymptomatic infectious individuals  $\beta_a/(\beta_p + \beta_a + \beta_m + \beta_s)$  during the pre-lockdown and lockdown periods in the states of Arizona, Florida, New York, and the entire US.

| Period       | Transmission source       | Arizona | Florida | New York | US  |
|--------------|---------------------------|---------|---------|----------|-----|
| Pre-lockdown | Pre-symptomatic ( $E_p$ ) | 47%     | 43%     | 65%      | 26% |
|              | Asymptomatic ( $I_a$ )    | 19%     | 29%     | 21%      | 32% |
| Lockdown     | Pre-symptomatic ( $E_p$ ) | 48%     | 42%     | 35%      | 25% |
|              | Asymptomatic ( $I_a$ )    | 21%     | 34%     | 31%      | 38% |

## References

- [1] A. Davies, K.-A. Thompson, K. Giri, G. Kafatos, J. Walker, and A. Bennett, “Testing the efficacy of homemade masks: would they protect in an influenza pandemic?” *Disaster Medicine and Public Health Preparedness* **7**, 413–418 (2013).
- [2] L. Peng, W. Yang, D. Zhang, C. Zhuge, and L. Hong, “Epidemic analysis of COVID-19 in China by dynamical

modeling,” arXiv preprint arXiv:2002.06563 (2020).

[Online Version](#)

- [3] C. Zhou, “Evaluating new evidence in the early dynamics of the novel coronavirus COVID-19 outbreak in Wuhan, China with real time domestic traffic and potential asymptomatic transmissions,” medRxiv (2020).
- [4] N. M. Linton, T. Kobayashi, Y. Yang, K. Hayashi, A. R. Akhmetzhanov, S.-m. Jung, B. Yuan, R. Kinoshita, and H. Nishiura, “Incubation period and other epidemiological characteristics of 2019 novel coronavirus infections with right truncation: a statistical analysis of publicly available case data,” *Journal of Clinical Medicine* **9**, 538 (2020).
- [5] H. Sun, Y. Qiu, H. Yan, Y. Huang, Y. Zhu, and S. X. Chen, “Tracking and Predicting COVID-19 Epidemic in China Mainland,” medRxiv (2020).
- [6] L. Zou, F. Ruan, M. Huang, L. Liang, H. Huang, Z. Hong, J. Yu, M. Kang, Y. Song, J. Xia, et al., “SARS-CoV-2 viral load in upper respiratory specimens of infected patients,” *New England Journal of Medicine* **382**, 1177–1179 (2020).
- [7] C. You, Y. Deng, W. Hu, J. Sun, Q. Lin, F. Zhou, C. H. Pang, Y. Zhang, Z. Chen, and X.-H. Zhou, “Estimation of the time-varying reproduction number of COVID-19 outbreak in China,” Available at SSRN 3539694 (2020).
- [8] World Health Organization, “Coronavirus disease 2019 (COVID-19): situation report, 46,” WHO (2020).
- [9] Z. Wu and J. M. McGoogan, “Characteristics of and important lessons from the coronavirus disease 2019 (COVID-19) outbreak in China: summary of a report of 72 314 cases from the Chinese Center for Disease Control and Prevention,” *JAMA* (2020).
- [10] M. Arentz, E. Yim, L. Klaff, S. Lokhandwala, F. X. Riedo, M. Chong, and M. Lee, “Characteristics and outcomes of 21 critically ill patients with COVID-19 in Washington State,” *Jama* (2020).
- [11] S. Kissler, C. Tedijanto, E. Goldstein, Y. Grad, and M. Lipsitch, “Projecting the transmission dynamics of SARS-CoV-2 through the postpandemic period,” *Science* (2020).

[Online Version](#)

- [12] N. M. Ferguson, D. Laydon, G. Nedjati-Gilani, N. Imai, K. Ainslie, M. Baguelin, S. Bhatia, A. Boonyasiri, Z. Cucunubá, G. Cuomo-Dannenburg, et al., “Impact of non-pharmaceutical interventions (NPIs) to reduce COVID-19 mortality and healthcare demand,” London: Imperial College COVID-19 Response Team, March **16** (2020).
- [13] Centers for Disease Control and Prevention, “Coronavirus disease 2019 (COVID-19): Caring for someone sick at home,” CDC (Assessed on April 29, 2020).

[Online Version](#)
